# Supplementary material for: The Safer Prescription of Opioids Tool (SPOT): A Novel Clinical Decision Support Digital Health Platform for Opioid Conversion in Palliative and End of Life Care—A Single-Centre Pilot Study
Source: MDPI journal article supplement (doi:10.3390/ijerph16111926), 2019-05-31
Supplement: s1 [file s1]

## **Supplementary Material 2: SPOT YouTube video link**

(updated for current iteration)

<https://www.youtube.com/watch?v=AkbtwiUj4tc>

<https://www.youtube.com/watch?v=EF3a8SGit-o>

<https://www.youtube.com/watch?v=ER3jMpEWFnk&t=7s>
